# Supplementary material for: Facultative dosage compensation of developmental genes on autosomes in Drosophila and mouse embryonic stem cells
Source: PubMed Central journal article supplement (PMC6128902; doi:10.1038/s41467-018-05642-2), 2018-09-07
Supplement: 41467_2018_5642_MOESM1_ESM.pdf [file 41467_2018_5642_MOESM1_ESM.pdf]

## Description of Additional Supplementary Files

### **File Name: Supplementary Data 1**

**Description:** Comprehensive overview of all ChIP-seq, FLASH and RNA-seq datasets generated in this study.

### **File Name: Supplementary Data 2**

**Description:** a) Complete list of Drosophila MSL2tg-bound genes (MACS peak within 200 bp of a TSS excluding HAS peaks) b) Same analysis, but only a single gene overlap allowed c)-e) Genelist of TSS peaks associated with Cluster 1, 2 and 3 (Figure 2).

### **File Name: Supplementary Data 3**

**Description:** DEseq output of differentially expressed genes in Msl2Δ mESCs in Serum condition (FDR < 0.05).

### **File Name: Supplementary Data 4**

**Description:** DEseq output of differentially expressed genes in Msl2Δ mESCs in 2i condition (FDR < 0.05).

### **File Name: Supplementary Data 5**

**Description:** Individual datapoints of barplots presented in this study.
