# Supplementary material for: Facultative dosage compensation of developmental genes on autosomes in Drosophila and mouse embryonic stem cells
Source: PubMed Central journal article supplement (PMC6128902; doi:10.1038/s41467-018-05642-2), 2018-09-07
Supplement: 41467_2018_5642_MOESM3_ESM.pdf [file 41467_2018_5642_MOESM3_ESM.pdf]

**Facultative dosage compensation of developmental genes on  
autosomes in *Drosophila* and mouse embryonic stem cells**

**Valsecchi et al.**

**Supplementary Information**

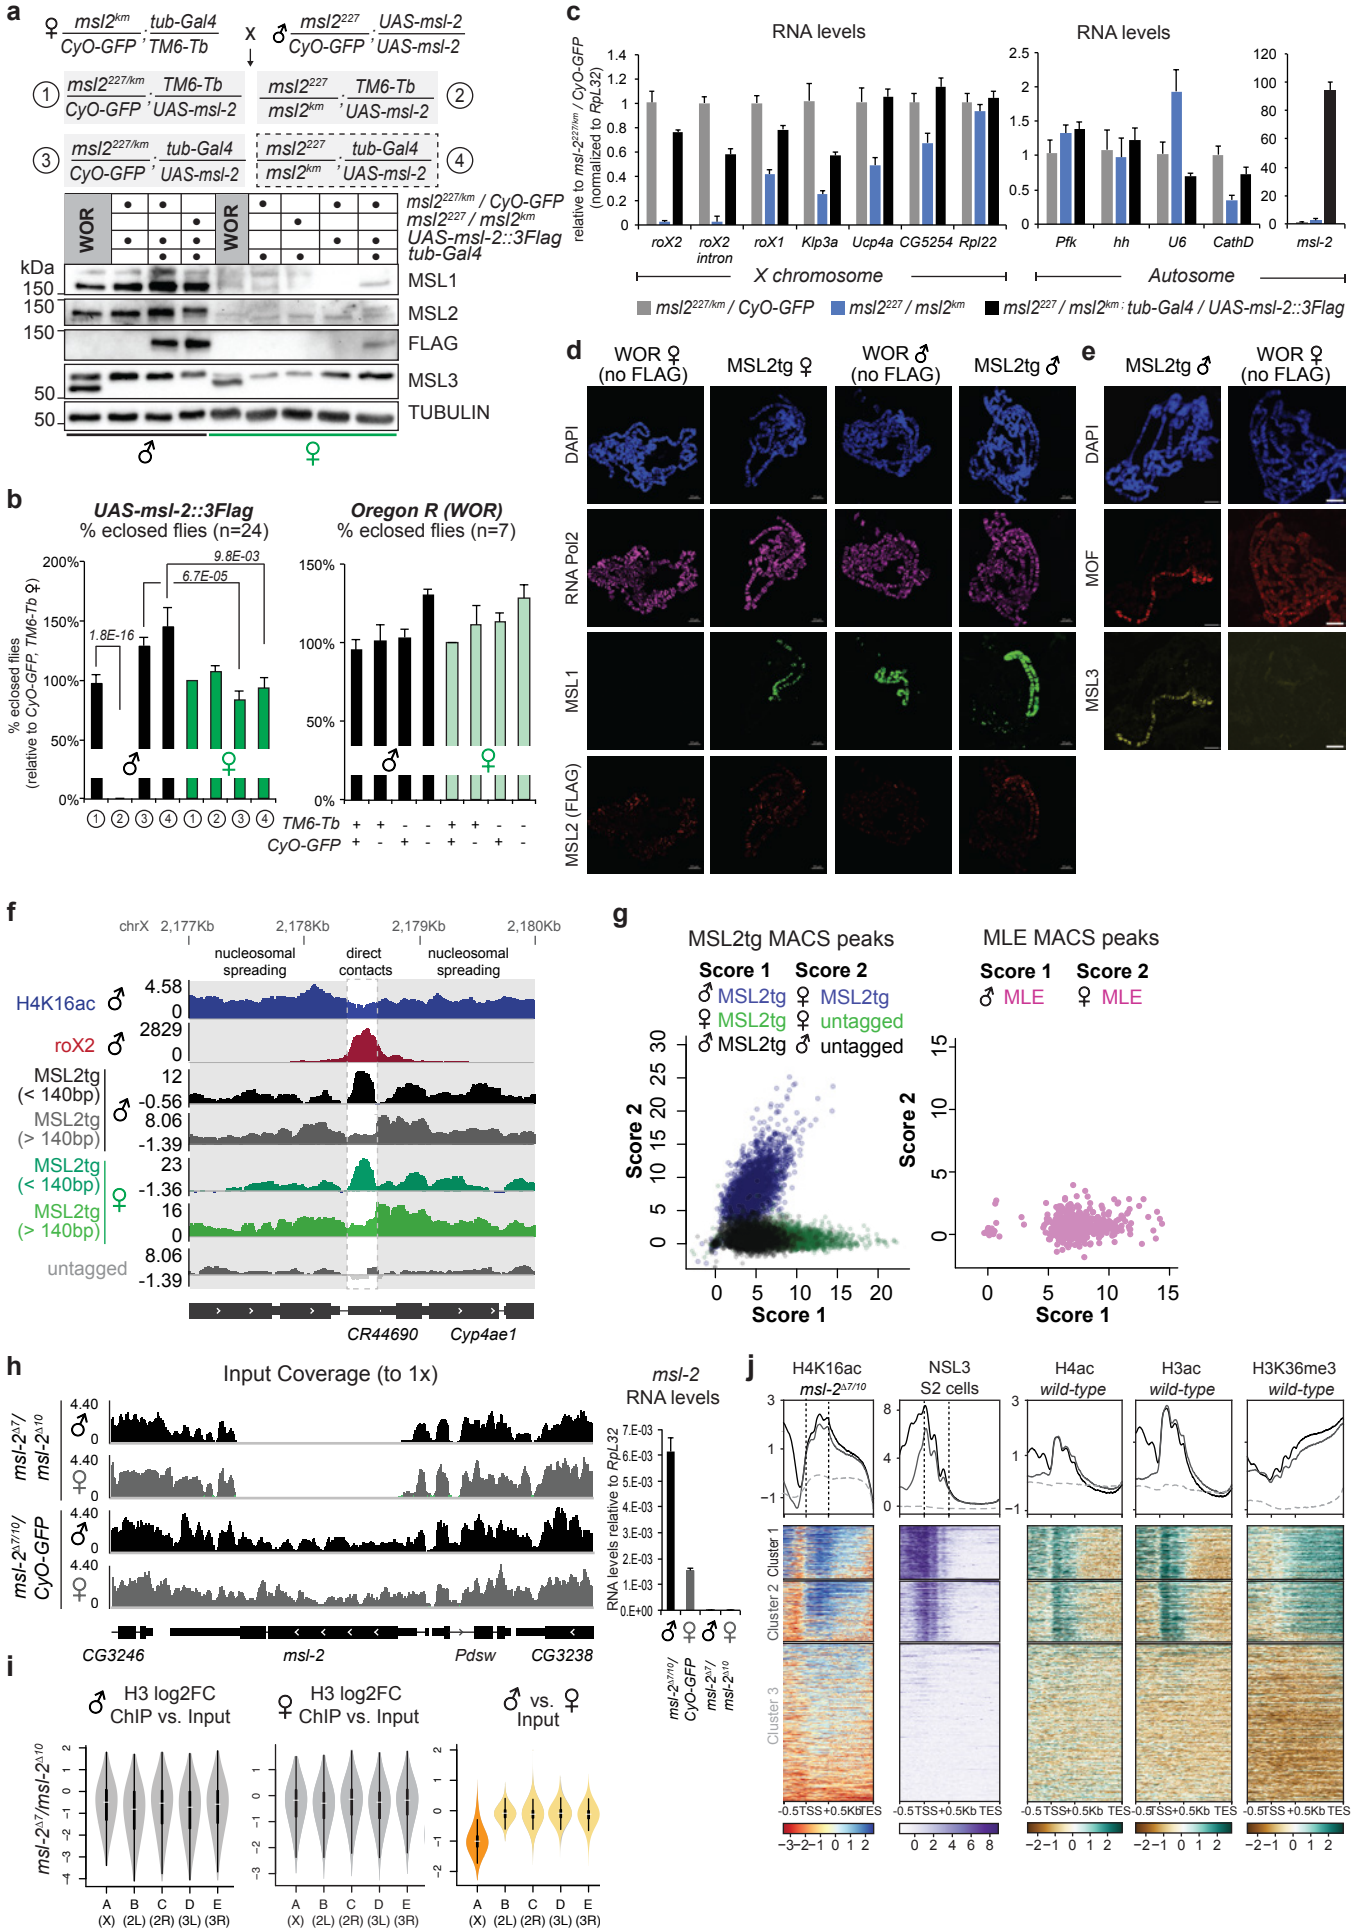

## Supplementary Figure 1

a) Characterization of transgenic *UAS-msl-2::3Flag* flies. The scheme indicates the crossing strategy and progeny obtained. Western blots from heads show *tub-Gal4* driven *UAS-msl-2::3Flag* protein expression levels nearly identical to the wild-type control male flies. In female heads, ectopic MSL2tg does not accumulate to the same levels as in males.

b) Progeny was counted from the offspring of crosses (24 vials) and expressed as a % of the *CyO*, *Act5C-GFP*, *TM6*, *Tb* female progeny. The numbers refer to genotypes stated in Supplementary Fig. 1a. Error bars represent the SD, P-values were calculated using a one-tailed t-test. Male lethality in *msl-2<sup>227</sup>/msl-2<sup>km</sup>* is fully rescued by ectopic expression of *UAS-msl-2::3Flag* with *tub-Gal4* at 25°C. Note the effect of the *CyO*, *Act5C-GFP* and *TM6*, *Tb* balancer chromosomes on viability of wild-type male and female flies (right panel). Ectopic expression of MSL2tg in females causes around 30% reduction in viability with a mildly delayed eclosion rate compared to controls (data not shown).

c) Real-time RT-qPCR analyses of the indicated genes from early male L3 larvae. The RNA level of each gene is expressed relative to the heterozygous *CyO*, *Act5C-GFP* progeny while normalizing to *RpL32*. The bar plot represents the average of 4 independently collected samples with error bars indicating the SEM.

d) Polytene squashes of male and female wild-type Oregon R (WOR) and MSL2tg lines (*msl-2<sup>227</sup> / msl-2<sup>km</sup>*; *tub-Gal4 / UAS-msl-2::3Flag*). Squashes were immunostained with RNA Pol2, MSL1 and FLAG antibodies, respectively. Scale bar = 10 μm.

e) As in d) but staining for MOF and MSL3. Note that the contrast setting of the female WOR squash was set different compared with males to be able to visualize autosomal MOF staining within the NSL complex. Scale bar = 10 μm.

f) Genome browser snapshot of a selected HAS on the X chromosome illustrating the difference between small and large reads recovered in MNase-fragmented MSL2tg ChIP-seq. Coverage tracks were generated using deeptools bamCompare and plotted in IGV.

g) Enrichment scores on the merged list of all called MSL2tg peaks (left) or MLE peaks (right) were calculated using deeptools multiBigwigSummary and plotted in R. Male and female peaks are highly correlated in MSL2tg ChIPs (blue dots). No

enrichment can be detected in each corresponding untagged control. ChIP peaks for MLE can be only detected in males, but not females.

h) Characterization of the *m<sup>sl</sup>-2<sup>Δ7</sup>* and *m<sup>sl</sup>-2<sup>Δ10</sup>* CRISPR deletion alleles created in this study. The two alleles were independently obtained, but are identical in molecular nature, as assayed by DNA sequencing of PCR amplicons from the *m<sup>sl</sup>-2* locus (data not shown). The read coverage of the “input” samples (H4K16ac ChIP-seq experiment) over the *m<sup>sl</sup>-2* locus shows the absence of reads from the gene in *m<sup>sl</sup>-2<sup>Δ7</sup>* / *m<sup>sl</sup>-2<sup>Δ10</sup>* transheterozygous lines. Quantification of RNA levels by real-time qRT-PCR in early L3 larvae indicates the absence of any *m<sup>sl</sup>-2* RNA expression normalized to *RpL32*. The barplot represents the average of 4 independently collected samples with error bars indicating the SEM.

i) Violin plots showing the distribution of enrichment scores per 1 kb bin on each chromosomal arm for the H3 ChIP performed in parallel to the H4K16ac ChIP shown in Figure 1. Scores were calculated using `deeptools multiBigwigSummary` and plotted in R. For the Inputs, the analyses were performed on  $\log_2FC$  Input (male) / Input (female) coverage files.

j) Heatmaps, where 3 unsupervised k-Means clusters were generated based on the H4K16ac ChIP-seq profiles in *m<sup>sl</sup>-2<sup>Δ7</sup>* / *m<sup>sl</sup>-2<sup>Δ10</sup>* mutant males. They were sorted according to the enrichment intensity within each cluster. The NSL3 ChIP from S2 cells<sup>1</sup>, H4ac, H3ac and H3K36me3 ChIP (this study) from L3 larvae was plotted on the same regions keeping the order according to the clustering of the H4K16ac ChIP-seq.



## Supplementary Figure 2

a) Genome browser snapshot comparing MSL2tg (male L3 larvae, this study), MSL2 (S2 cells<sup>2</sup>) and roX ChIRP (L3 larvae<sup>3</sup>) on X chromosome and autosomes. Data normalization is described in methods.

b) Heatmaps showing CLAMP (L3 larvae<sup>4</sup>) enrichment on HAS sorted by enrichment intensity. The HAS center was used as a reference point, while plotting the signal +/- 0.8Kb. The mean enrichment profile is shown on top of the heatmap, ChIP data normalization is described in methods.

c) Genome browser snapshot showing that MLE and MSL2tg spreading is pronounced at H3K36me3 positive regions, whereas H4K16ac spreads beyond active genes. roX2 ChIRP signal is confined to HAS. Data normalization is described in methods.

d) Analysis of X-linked peaks, which do not overlap with HAS. Mean enrichment profile at non-HAS peaks on the X in comparison to all autosomal sites is shown. The MEME motif analysis of these peaks is shown below, where the top-scoring motif was chosen.

e) Real-time RT-qPCR analyses of the indicated genes from the same samples shown in Figure 2g. The RNA level of each gene was calculated relative to *RpL32* expression as a reference gene. The barplot represents the average of 3 independent biological replicates with error bars indicating the SEM.

f) Real-time RT-qPCR analyses of the indicated genes from heterozygous *mle*<sup>9</sup>/*CyO*, *GFP* (male, female) and homozygous *mle*<sup>9</sup>/*mle*<sup>9</sup> (female) L3 larvae. The RNA level of each gene was calculated relative to the geometric mean of *RpL32* and *Pfk* and expressed relative to the *mle*<sup>9</sup>/*CyO*, *GFP* males. The barplot represents the average of 5 independent biological replicates with error bars indicating the SEM.

g) Characterization of fly lines, where the *msl-2* gene was CRISPR-tagged at its C-terminus with a 3HA-6His-Bio tag (*msl-2::3HA* line). Three independent lines were obtained (#7, #8, #9) and analyzed by Western blot from heads. They display identical protein expression levels compared to the endogenous MSL2 protein in wild-type Oregon R flies (lanes 7 and 8).

h) Male and female progeny of the homozygous *msl-2::3HA* line #7 in a total of 5 vials were counted each day after the first flies eclosed (*msl-2* null mutants are male-specific lethal, whereas females are unaffected). The barchart represents the average of 5 vials (progeny eclosed on each day in % of the total number of flies eclosed per

vial) and error bars represent the SD. *msl-2::3HA* males and females display equal viability and no developmental delay.

i) ChIP-qPCR analyses of endogenously tagged *msl-2::3HA* male L3 larvae. The barplot shows the average of 3 independent biological replicates / experiments, the error bars represent the SEM. Enrichment values were calculated relative to input and serial dilutions performed to account for primer efficiency. The data is expressed as fold change enrichment over the non-targets.

j) Polytene squash of the endogenous *msl-2::3HA* line. Squashes were immunostained with MSL1 and HA antibodies, respectively. The transgene displays the expected localization to the X chromosome. Scale bar = 50  $\mu\text{m}$ .

k) Genome browser snapshots showing MLE and MSL2-HA binding to roX1 and roX2 RNA in male and female L3 larvae. Oregon R L3 larvae (untagged) were used as controls. Note that in endogenously tagged *msl-2::3HA* line, females do not express MSL2-HA protein. The data range represents the number of uniquely mapped alignments for each profile. Tracks show merged biological duplicates except for the untagged larvae.

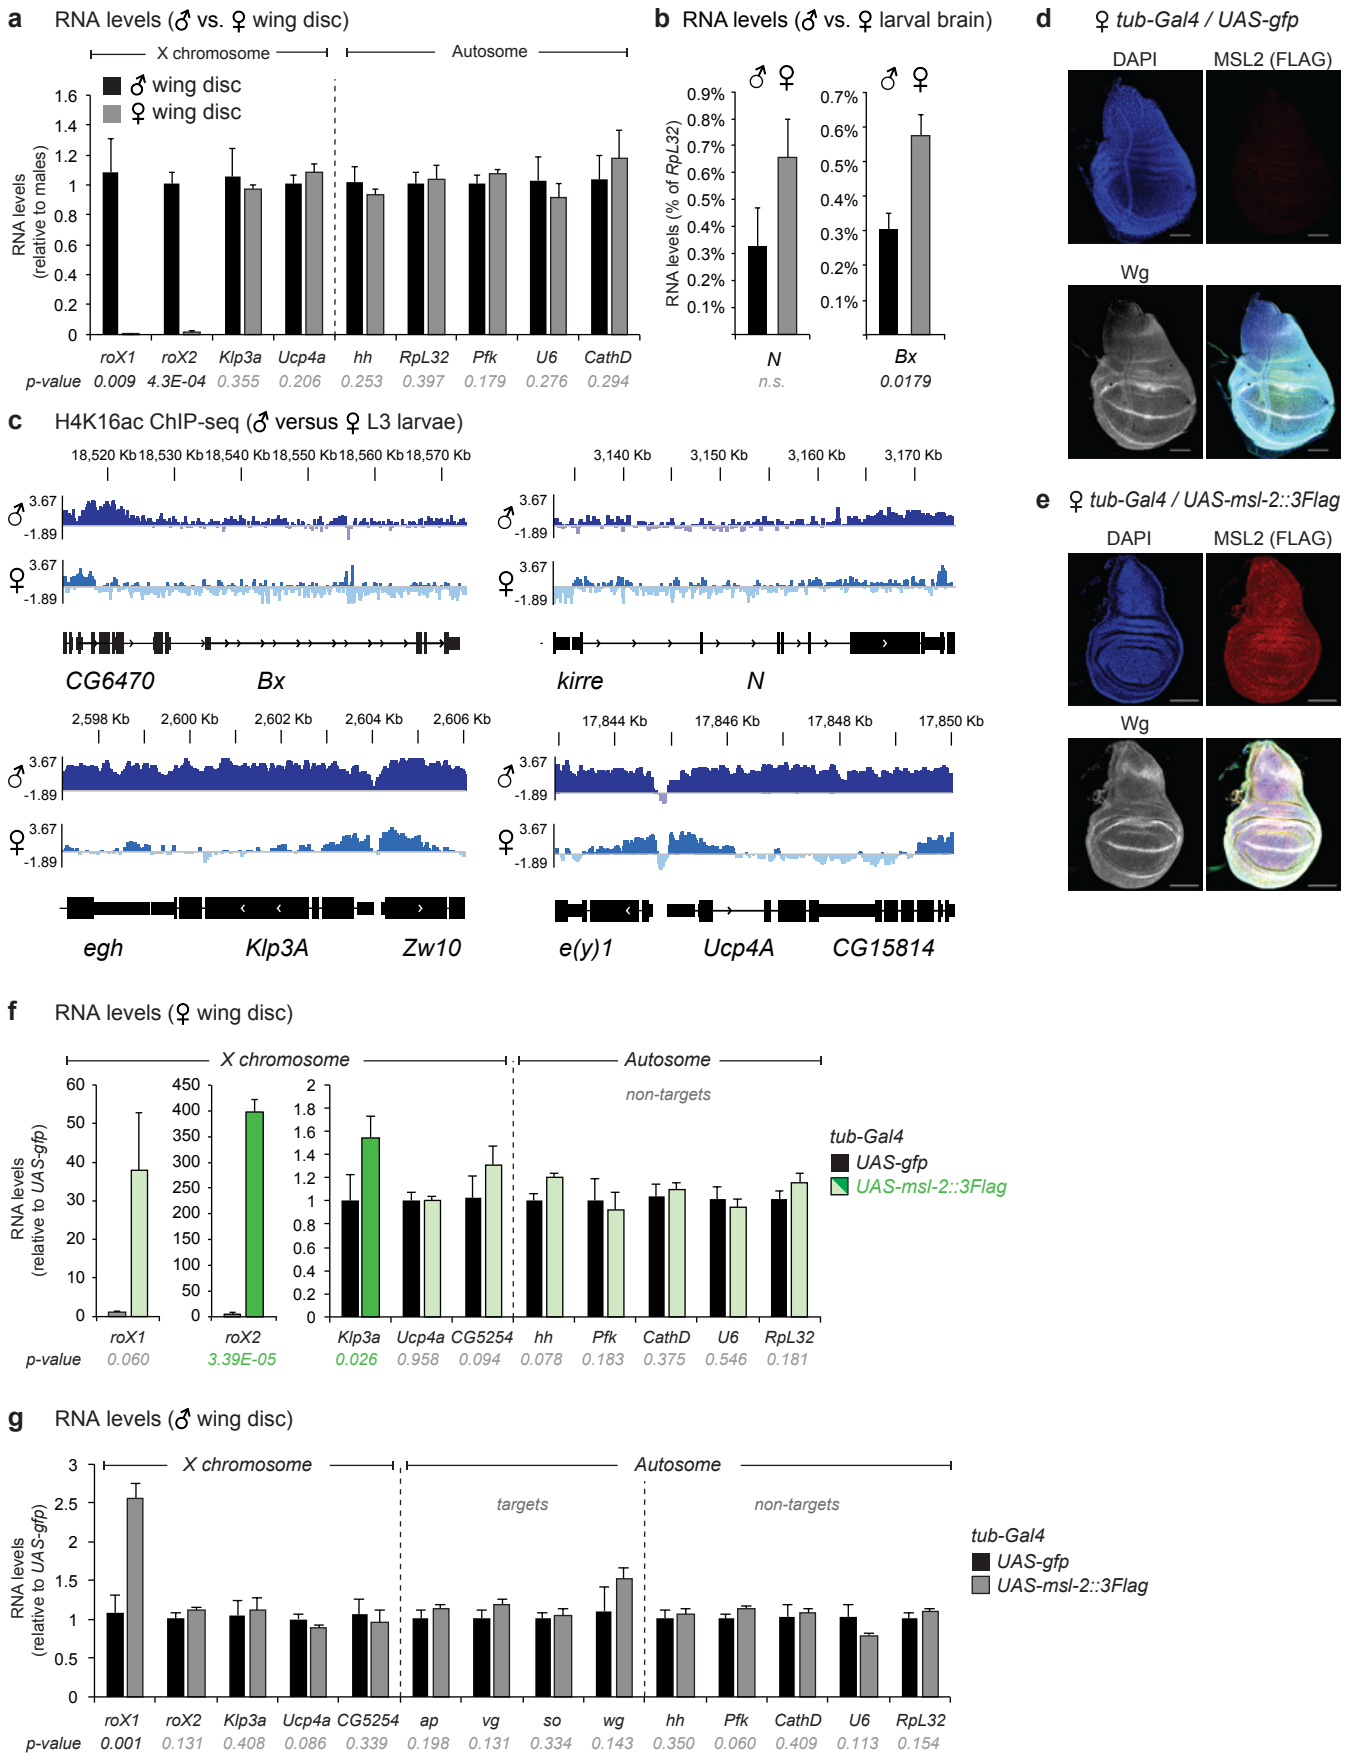



### Supplementary Figure 3

a) Real-time RT-qPCR analyses of the indicated genes in male and female wild-type Oregon R wing discs. The RNA level of each gene was calculated relative to the geometric mean of *RpL32*, *Pfk* and *U6* expression level and expressed relative to males. The bar plot represents the average of 4 independently collected samples each consisting of 2 wing discs with error bars indicating the SEM. P-values were calculated using a one-tailed t-test (males versus females).

b) Real-time RT-qPCR analyses of *N* and *Bx* in male and female wild-type L3 larval Oregon R brains. The barplot represents the average of 3 independently collected samples each consisting of 1 larval brain with error bars indicating the SEM, P-values were calculated using a one-tailed t-test (males versus females).

c) Genome browser snapshot showing H4K16ac enrichment in wild-type male and female L3 larvae on the X-linked *Bx*, *N*, *Klp3a* and *Ucp4a*. Data normalization is described in methods.

d)-e) Immunostainings of female wing discs with FLAG (red), Wingless (Wg, white) and DAPI in blue. The genotype in d) was *w ; ; tub-Gal4 / UAS-gfp* and in e) *w ; ; tub-Gal4 / UAS-msl-2::3Flag*. Scale bar = 50  $\mu$ M.

f) As in a), the data is expressed relative to the *UAS-GFP* expressing control samples. P-values were calculated using a one-tailed t-test (*UAS-msl-2::3Flag* flies versus *UAS-gfp* controls). The genotype of the female flies was *w ; ; tub-Gal4 / UAS-msl-2::3Flag* or *w ; ; tub-Gal4 / UAS-gfp*.

g) As in f), but for males *w / Y ; ; tub-Gal4 / UAS-msl-2::3Flag* or *w / Y ; ; tub-Gal4 / UAS-gfp* flies.

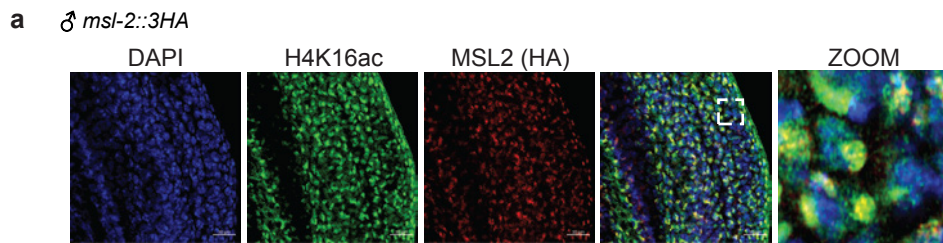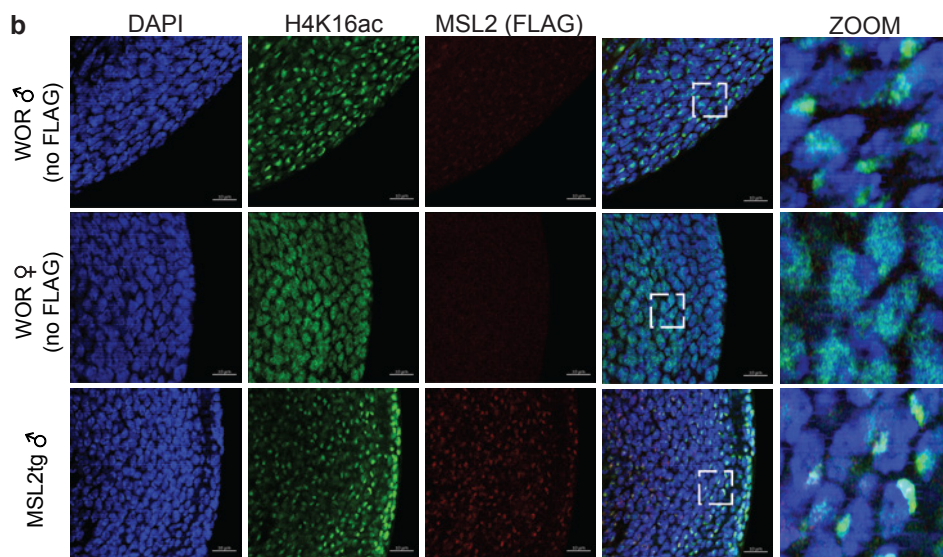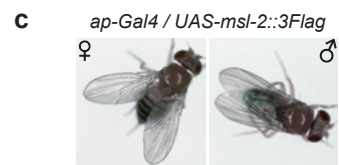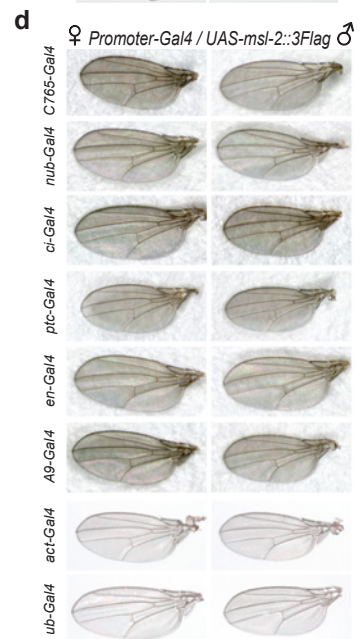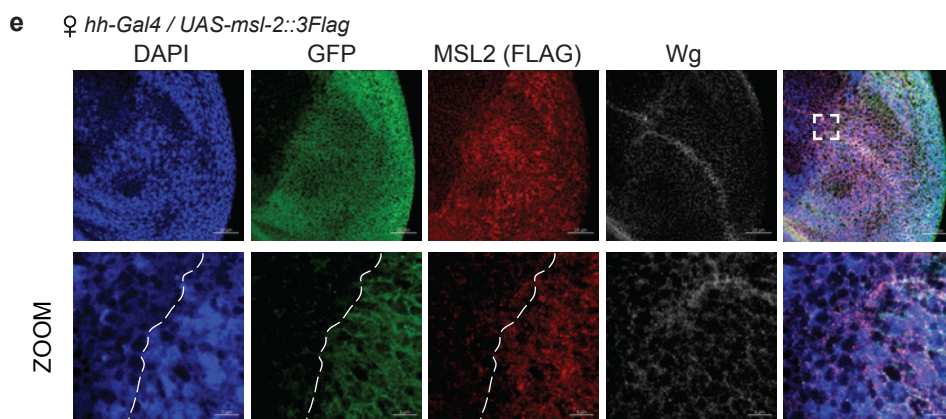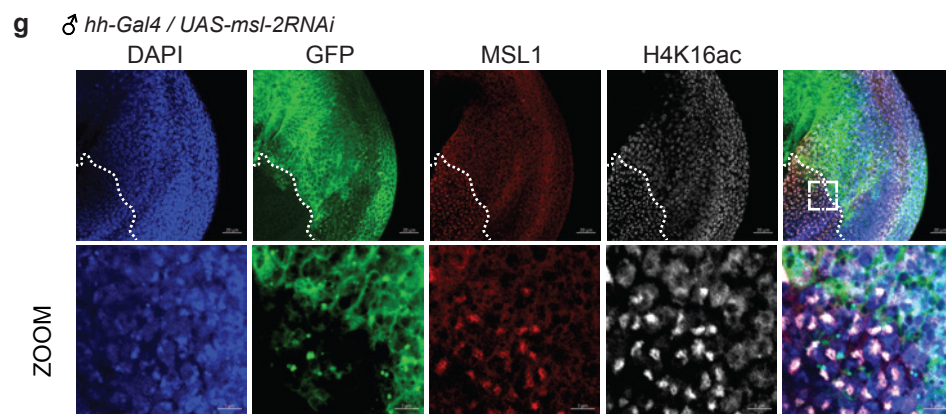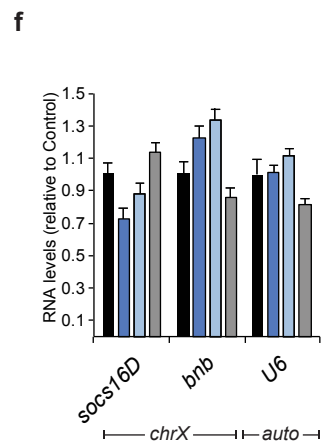

UAS-RNAi

■ Control

■ *msl-2* #1

■ *msl-2* #2

■ ♂ WOR

#### Supplementary Figure 4

a) Immunostainings of male *msl-2::3HA* wing discs with H4K16ac (green), HA (red), and DAPI in blue. The very right panel shows a zoom from the merged panel. Scale bar = 10  $\mu$ M. The signal for MSL2-HA and H4K16ac overlap in the X chromosomal territory within the male nucleus.

b) Immunostainings of wing discs with H4K16ac (green), FLAG (red) and DAPI (blue). WOR refers to wild-type Oregon R, MSLtg to *msl-2<sup>227</sup> / msl-2<sup>km</sup>*; *tub-Gal4 / UAS-msl-2::3Flag* wing discs. The very right panel shows a zoom from the merged panel. Scale bar = 10  $\mu$ M.

c) Pictures of female and male adult flies expressing *ap-Gal4 / UAS-msl-2::3Flag* (BL3041).

d) Pictures of wings of female and male adult flies expressing *UAS-msl-2::3Flag* using the indicated Gal4-drivers (see methods).

e) Immunostainings of female wing discs (*UAS-gfp / w ; ; hh-Gal4 / UAS-msl-2::3Flag*) with GFP (green), FLAG (red), Wingless (Wg, white) and DAPI (blue). The bottom panel shows a zoom from the top panel. Scale bar = 5  $\mu$ M.

f) As in Figure 4f) Real-time RT-qPCR analyses of the indicated genes in male wing discs upon *UAS-msl-2<sup>RNAi</sup>* with *hh-Gal4*.

g) Immunostainings of male wing discs (*UAS-gfp / Y ; ; hh-Gal4 / UAS-msl-2<sup>RNAi</sup>*, BDSC 31627) with GFP (green), MSL1 (red), H4K16ac (white) and DAPI (blue). The bottom panel shows a zoom, DAPI is shown in blue. Scale bar = 5  $\mu$ M.

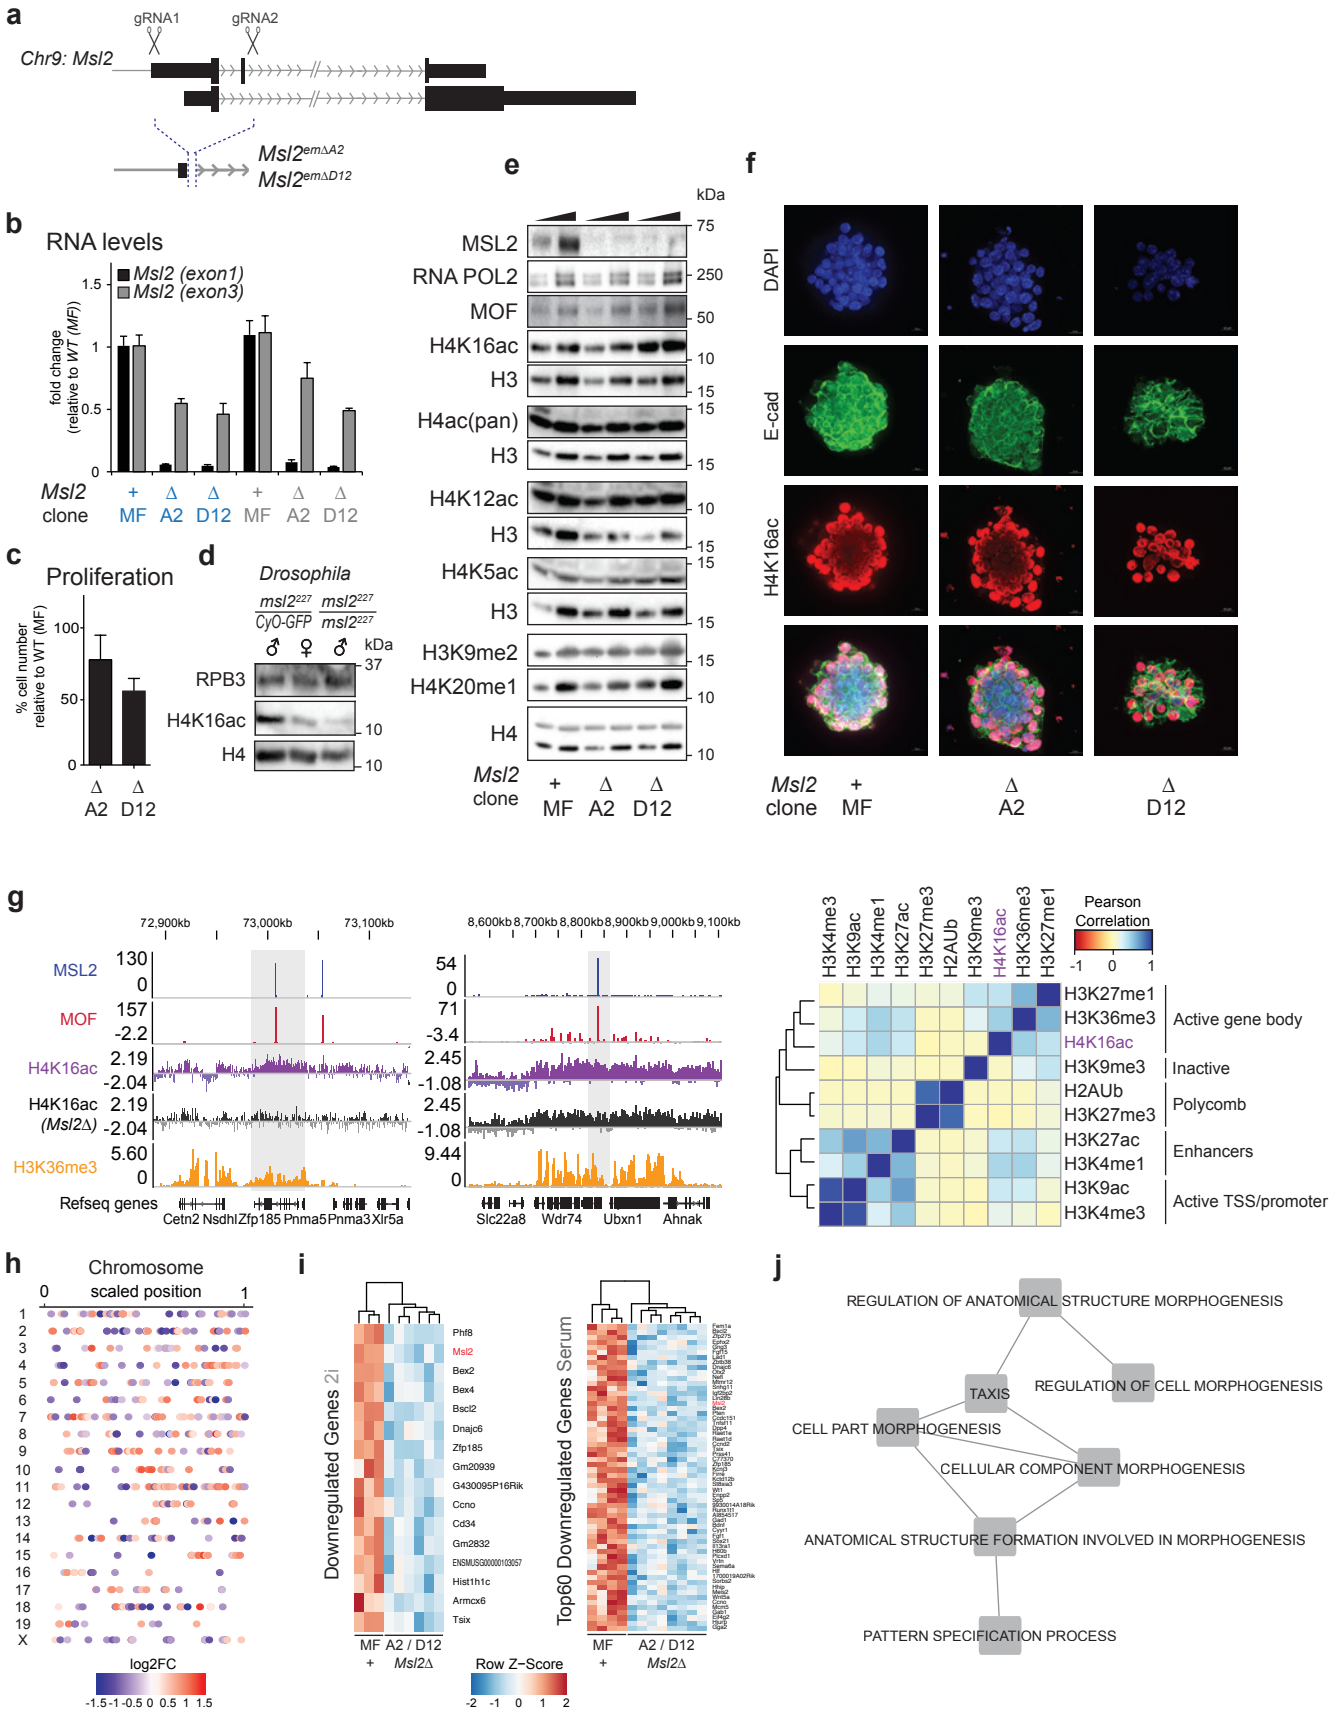

### Supplementary Figure 5

a) Scheme showing the CRISPR/Cas9-mediated strategy to delete *Msl2* in mESCs. The two independently obtained knock-out clones lack most of the 5'UTR, exon1 and exon2 affecting all isoforms.

b) Real-time RT-qPCR analyses of *Msl2* RNA levels in parental (MF clone) versus the two *Msl2* knock-out clones (A2 and D12) in Serum (blue, left) and 2i medium (grey, right). The RNA level was calculated relative to *Hprt*. The bar plot represents the average of 4 independent experiments with error bars indicating the SEM. Note that transcripts can still be detected from exon 3, which can be attributed to non-sense mediated decay (NMD).

c) Cell growth ratio of *Msl2* $\Delta$  cells (A2 and D12) versus parental MF cells after 4 days in culture. The barplot represents the average of 4 independent experiments with parental (MF) cells set to 100% and error bars indicating the SEM.

d) Cropped western blots showing bulk H4K16ac levels in heterozygous *msl-2<sup>227</sup>/CyO, GFP* and *msl-2<sup>227</sup>/msl-2<sup>227</sup>* null mutant *Drosophila* L3 larvae. H4 and Rpb3 serve as loading controls.

e) Cropped western blots showing the impact of *Msl2* deletion on bulk levels of the indicated proteins and histone modifications in mESCs. The same extracts were analyzed on multiple gels / membranes. For each condition two different amounts were loaded.

f) Immunofluorescence of parental MF and *Msl2* $\Delta$  mESC colonies grown in 2i medium. Displayed stainings are DAPI (blue), E-cadherin (green) and H4K16ac (red). Scale bar = 10  $\mu$ m.

g) Genome browser snapshot of MSL2, MOF, H4K16ac, H4K16ac (*Msl2* $\Delta$ ) and H3K36me3 ChIP-seq at the *Zfp185* (left) and *Bsc12* (right) locus. The grey shaded area corresponds to approximately 50 kb. Normalization is described in methods. The right panel shows the Pearson correlation of several histone modifications compared to the H4K16ac ChIP-seq profiles generated in this study. Enrichment scores were calculated in 1kb tiled bins across the mouse genome, while excluding regions from the ENCODE blacklist. The Correlation was then plotted from the deeptools multibigwigSummary output using plotCorrelation function.

h) DE genes by RNA-seq of *Msl2* $\Delta$  cells in Serum were plotted according to their position on each chromosome, while scaling each chromosome to the same size. Each

dot represents a DE gene, where the color scale indicates the fold change of that particular gene.

i) Heatmaps of all downregulated genes in 2i (left) and the Top60 (by p-adj) downregulated genes in Serum grown mESCs (Parental MF versus *Ms12Δ* cells).

j) GO based gene set enrichment map of the DE genes upon *Ms12Δ* in Serum grown mESCs.

Supplementary Figure 1a

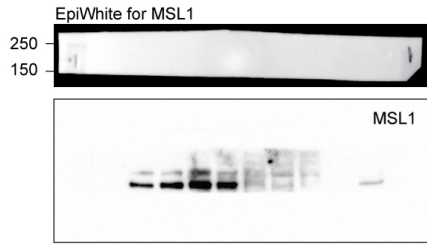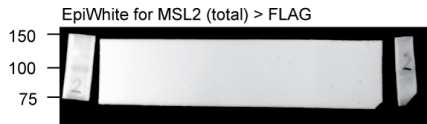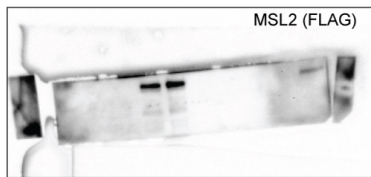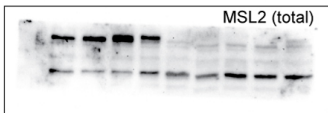

MSL1 / MSL2 (merged)

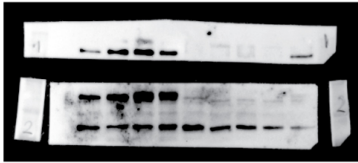

EpiWhite for MSL3 > Tubulin

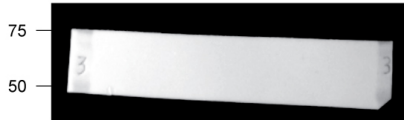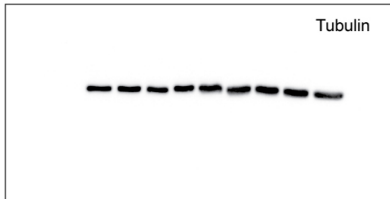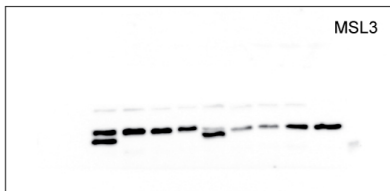

Supplementary Figure 5d

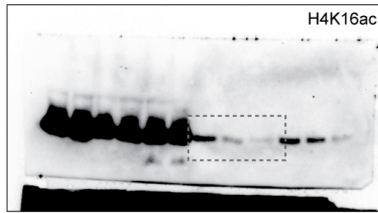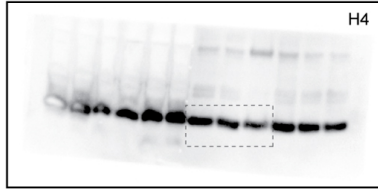

EpiWhite for H4K16ac > H4

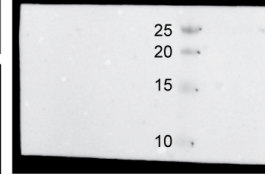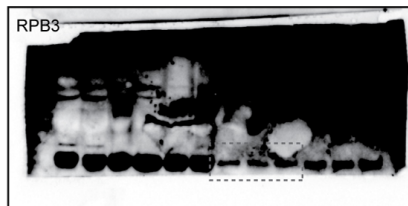

EpiWhite for RPB3

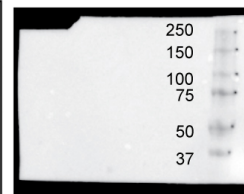

Supplementary Figure 2g

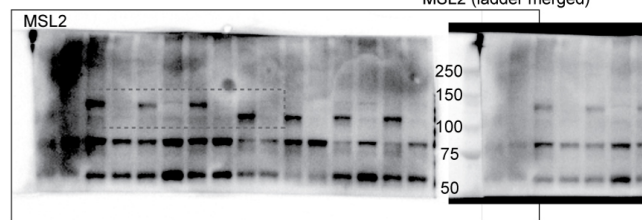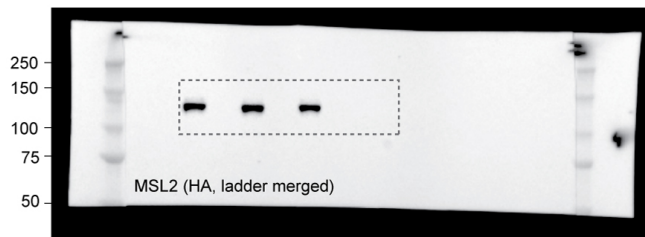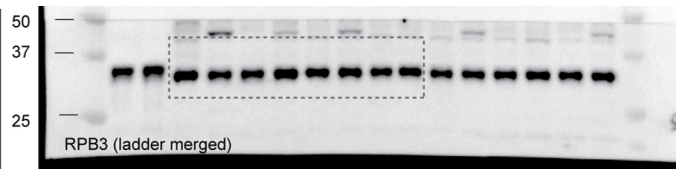

Supplementary Figure 5e

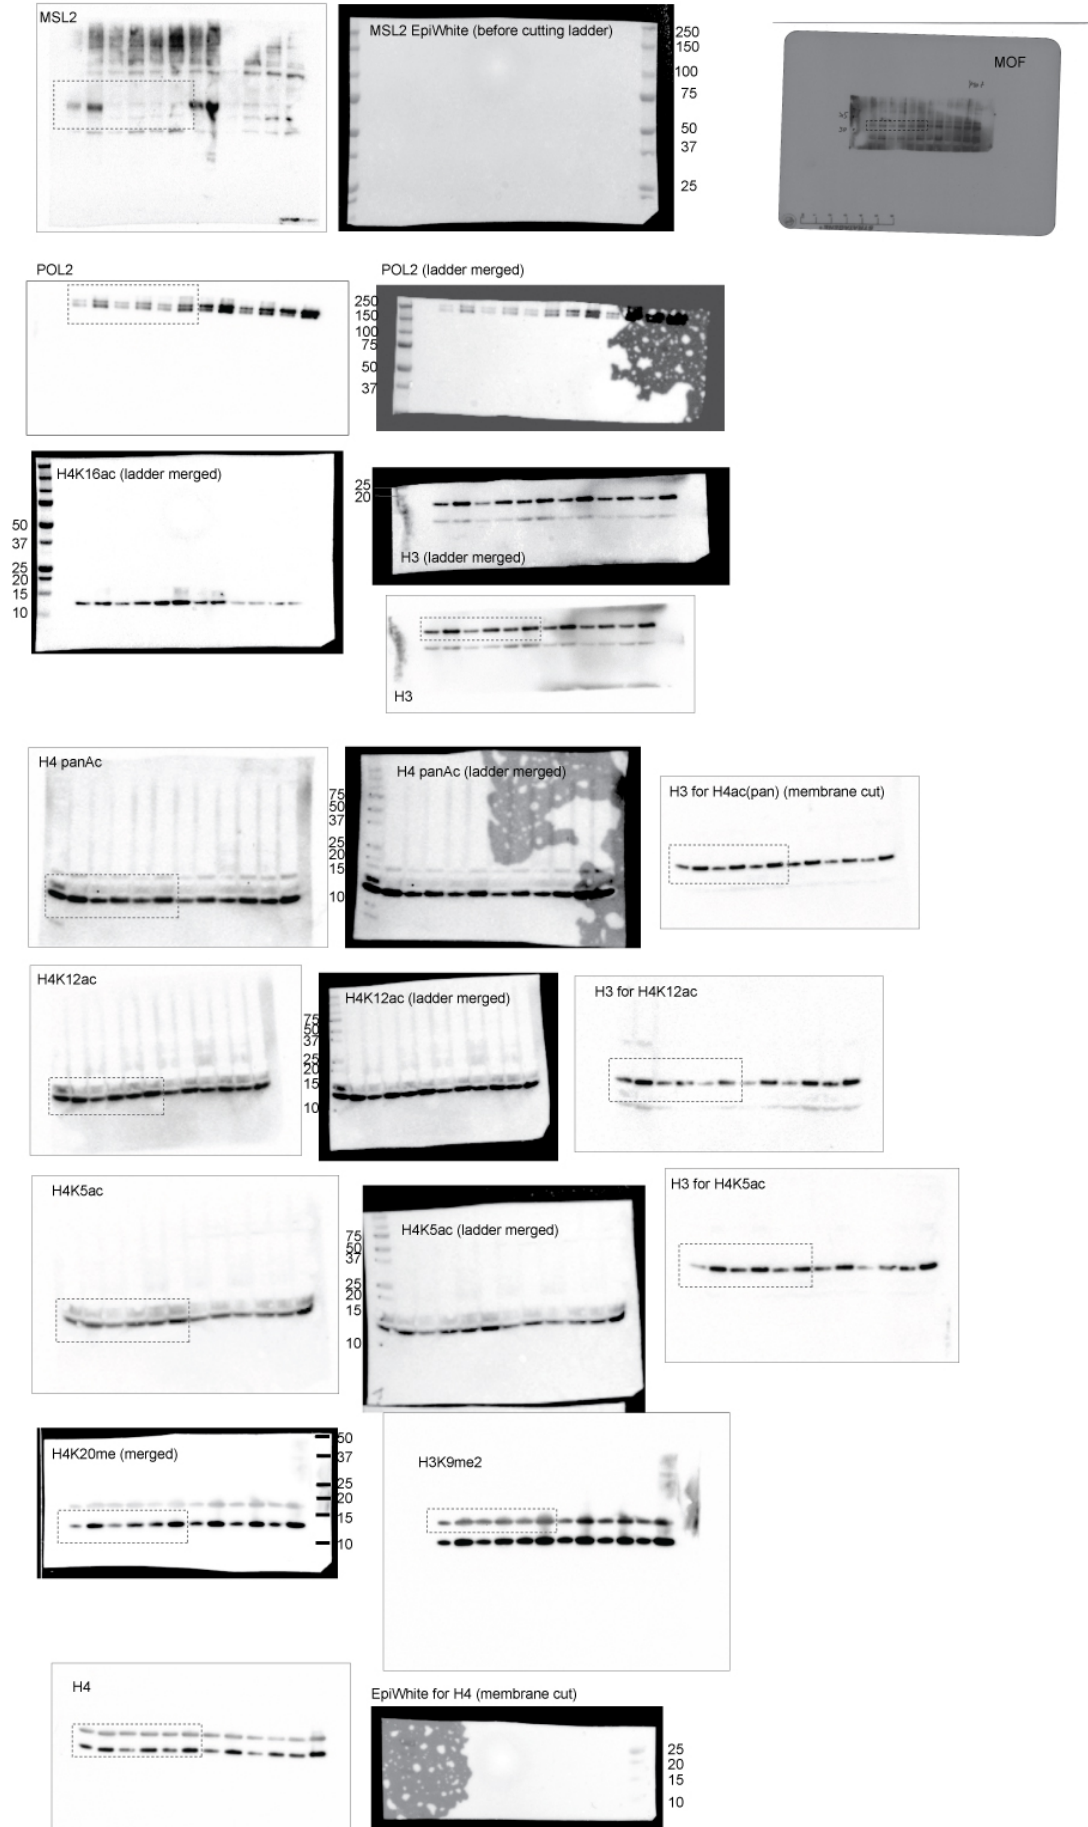



### **Supplementary Figure 6**

Uncropped Western Blots with molecular weight markers. Note that for certain antibodies, the ladder causes background and had to be cut before applying HRP solution. Some blots are represented as merged with the molecular weight marker causing slightly different appearance of contrast than presented in the actual figures (blots marked as “ladder merged”). The molecular weight marker in Supplementary Fig. 5d and certain blots of Supplementary Fig. 5e was loaded together with sample due to limitation of wells. H3K9me2 and H4K20me1 antibodies were applied / detected at the same time.

## RNA expression

| ID                | Sequence                    | Target         |     |
|-------------------|-----------------------------|----------------|-----|
| <b>Drosophila</b> |                             |                |     |
| ck1313            | TCAATCTCTAAGACAACGCCG       | ap             | fwd |
| ck1314            | GCTATTGGACACTTGACACTGG      | ap             | rev |
| ck1315            | CCATCGCTAAACCCGAAAAG        | vg             | fwd |
| ck1316            | GTAGGCACCGTACATAACTTCG      | vg             | rev |
| ck1387            | ATACTGCTTTGGCGAGGACC        | wg             | fwd |
| ck1388            | CCAGCCCTGGTTACCGATTT        | wg             | rev |
| ck1317            | GGAGATCGTGTTTTGAGCATG       | hh             | fwd |
| ck1318            | AGGTTGCCGTCCATGAAG          | hh             | rev |
| ck1319            | GCGCGTCCAGCTAAAATAAAG       | Bx             | fwd |
| ck1320            | CTCCAACCTCAACTCCAATC        | Bx             | rev |
| ck1321            | ATTATAGCCCCACACTTCCG        | so             | fwd |
| ck1322            | ACACAGATCGATGCAGAATC        | so             | rev |
| ck640             | ATCGGTTACGGATCGAACAA        | RpL32          | fwd |
| ck641             | GACAACTCCTTGGCCTTCT         | RpL32          | rev |
| ck439             | GCTTCGGCAGAACATATACT        | snRNA::U6      | fwd |
| ck440             | ACGATTTTGGCGTGCATCCT        | snRNA::U6      | rev |
| ck838             | AAGGGCTATGAGGGCAGAGA        | N              | fwd |
| ck839             | AGTCACCGATCCATCCAGA         | N              | rev |
| ck447             | GCCATCGAAGGGTAAATG          | rox2           | fwd |
| ck448             | CTTGCTTGATTTTGGCTTCG        | rox2           | rev |
| ck449             | TCCCACCCGAATAACCAACC        | rox1           | fwd |
| ck450             | GCATAGGCTTTCAATACCGTTCC     | rox1           | rev |
| ck1247            | GCCCAGACGGCATACTTGAA        | msl-2          | fwd |
| ck1248            | CCCGCCGTTTGGAAAGATTC        | msl-2          | rev |
| ck644             | CTGAGGGCAAGTTCAAGGAG        | Pfk            | fwd |
| ck645             | AAGCCACCAATGATCAGGAG        | Pfk            | rev |
| ck451             | CGCAAGGAGTTCACACAGA         | Ucp4a          | fwd |
| ck452             | CTCCATTTGGATTTGCACCT        | Ucp4a          | rev |
| ck445             | CATTCCCATTCGGAGGAGTA        | Klp3a          | fwd |
| ck446             | GCAGCTCCTGTTTGGATCC         | Klp3a          | rev |
| OAG456            | ATCCTAGGCCTGGGCTACAA        | CathD          | fwd |
| OAG457            | AGAATGAGAACCACCGAGCG        | CathD          | rev |
| gs33f             | CCAGCAAGGTGGTCAAGAAG        | Rpl22          | fwd |
| gs33r             | CCATGATGCTATCCTCAGCA        | Rpl22          | rev |
| ck642             | CTCCTACTGGAAGGGCATCA        | CG5254         | fwd |
| ck643             | CCAGCCAGAGAAAAGGTCAG        | CG5254         | rev |
| ck1480            | gatacaaatgtgtacagtgaaatatgg | salm           | fwd |
| ck1481            | ctgatcgctacogatgtcttt       | salm           | rev |
| ck1474            | atcgagatggccttgcgtg         | ssp4           | fwd |
| ck1475            | catggctctcccacttcatea       | ssp4           | rev |
| ck1476            | gtttggctaaatcccaaggga       | esn            | fwd |
| ck1477            | cttctctctgctcttcttcca       | esn            | rev |
| ck1468            | cgtcggacaagccctaca          | opa            | fwd |
| ck1469            | gctcttctcgtccacattgc        | opa            | rev |
| ck1478            | agacgaatgcaatccagga         | socs16D        | fwd |
| ck1479            | gacccagtagccagccatag        | socs16D        | rev |
| l31a              | tcaactacctagtgcgcgtg        | mle            | fwd |
| l31b              | tcaaacactcgcttctgctg        | mle            | rev |
| ck834             | TCCAACCAAGTATGATCCA         | roX2 intron    | fwd |
| ck835             | AGGATTGTCATAGGCGCAAC        | roX2 intron    | rev |
| <b>Mouse</b>      |                             |                |     |
|                   | AACCCCGTGAATGCTACTG         | mmMsl2 (exon1) | fwd |
|                   | CTGTCGGAAGTAAGGCAAGAG       | mmMsl2 (exon1) | rev |
|                   | GGTTATCATGTACAGCAGCAACTC    | mmMsl2 (exon3) | fwd |
|                   | GTAGAAATGGAAAGTGGCTGAAT     | mmMsl2 (exon3) | rev |
|                   | GTATACCTAATCATATATGCCAGGA   | mmHpvt         | fwd |
|                   | GACATCTCGAGCAAGTCTTTCA      | mmHpvt         | rev |
|                   | GGCAGAACTTTTGACAGCTC        | mmPhf8         | fwd |
|                   | TTCAAGACAAGGATAGGCAGC       | mmPhf8         | rev |
|                   | CAGATTGACTGGAACCGAGAG       | mmBex2         | fwd |
|                   | CACGCTTGTTCACCTTTG          | mmBex2         | rev |
|                   | GGGTTGATGTTGGTAGATGAGG      | mmZfp185       | fwd |
|                   | TGGGCAATCTTCTCGGTTG         | mmZfp185       | rev |
|                   | CCGACAAGGGATAACTCACAC       | mmBsc12        | fwd |
|                   | AGGGCTCTCACCATCCTC          | mmBsc12        | rev |
|                   | GCAAAAGAGAAAGCCAAAGGG       | mmL.in28       | fwd |
|                   | ACCACAGTTGTAGCATCTTGG       | mmL.in28       | rev |
|                   | TTCCGGATTTTCACTCTGTCC       | mmTsix         | fwd |
|                   | GAGGGTTGAGGGAGTGTG          | mmTsix         | rev |

## ChIP-qPCR

| ID                | Sequence                 | Target             |     |
|-------------------|--------------------------|--------------------|-----|
| <b>Drosophila</b> |                          |                    |     |
| ck988             | TGCATTGGATTTACCGCTCCT    | vg                 | fwd |
| ck989             | GCCGCTCAATCGGAAGAGAA     | vg                 | rev |
| ck992             | ACGTGAATAAGGCAGCGGTA     | ap                 | fwd |
| ck993             | TGGCGCACAGCTTATACTCC     | ap                 | rev |
| ck998             | CGTCCCGCGCACAAAGTTAT     | so                 | fwd |
| ck999             | GCTTTCTCTCGCTTCGTGTG     | so                 | rev |
| ck923             | ACCGCTCTTTTCGGGACTTG     | roX1 HAS           | fwd |
| ck924             | GGGTGAGTGAGACCGCCATAG    | roX1 HAS           | rev |
| ck927             | GATTCGTGCCAAAGTGAGGG     | socs16D HAS        | fwd |
| ck928             | TCCCACCCACAACAAAACCT     | socs16D HAS        | rev |
| ck1048            | CGTATACGAGTCTGAAAAGAAAAG | roX2 HAS           | fwd |
| ck1049            | CTCTCTAAGCCAGCACCGTT     | roX2 HAS           | rev |
| ck1050            | GAGATAGCGATGGCGGTGTG     | CG15767/CG4064 HAS | fwd |
| ck1051            | CATGAAGCTTCCAATATCTCGC   | CG15767/CG4064 HAS | rev |
| ag382             | CCTTCGGAACCTAGATCCCC     | CG15011            | fwd |
| ag383             | AAGCCGGCGTTTTTGTCTAT     | CG15011            | rev |
| ag378             | CGTAACGGCACCCCTCAA       | Ent2               | fwd |
| ag379             | ACCGCACCCGACTACAAG       | Ent2               | rev |
| <b>Mouse</b>      |                          |                    |     |
| ck1108            | TGTTGTGTTGCAAGTGTGGA     | Zfp185             | fwd |
| ck1109            | AGTTGCCAGCAGCTAGTACA     | Zfp185             | rev |
| ck1116            | TTCTGTGTACAGCTTGTCCC     | Firre              | fwd |
| ck1117            | CCCCAGTAATGCTTTCGAGC     | Firre              | rev |
| ck1166            | CCTCCTTAGGCACGTAGTAGT    | Bex2               | fwd |
| ck1167            | GGGATCCGATTTGGGCC        | Bex2               | rev |
| ck1261            | CTCGTTGGTTTGGCAGATG      | Wap                | fwd |
| ck1262            | TCCATGTTCCAAAAGCCAG      | Wap                | rev |
| ck1267            | GCTACCCACTGTACAGATC      | Nanog              | fwd |
| ck1268            | TCTCCTGTCTCCCTCTTC       | Nanog              | rev |
| ck1158            | CGGACTCGTCTTAGCAG        | Arf1               | fwd |
| ck1159            | TCAFCGTGGGAGTCAAGGGG     | mmArf1             | rev |
|                   | ctctaccacttgaccatgatgac  | Intergenic         | fwd |
|                   | ggggtccaacagcatcteta     | Intergenic         | rev |

## **Supplementary Table 1**

List of qPCR primers used in this study

### Supplementary References

1. Lam, K.C. et al. The NSL complex regulates housekeeping genes in *Drosophila*. *PLoS genetics* **8**, e1002736 (2012).
2. Straub, T., Zabel, A., Gilfillan, G.D., Feller, C. & Becker, P.B. Different chromatin interfaces of the *Drosophila* dosage compensation complex revealed by high-shear ChIP-seq. *Genome research* **23**, 473-485 (2013).
3. Quinn, J.J. et al. Rapid evolutionary turnover underlies conserved lncRNA-genome interactions. *Genes & development* **30**, 191-207 (2016).
4. Kuzu, G. et al. Expansion of GA Dinucleotide Repeats Increases the Density of CLAMP Binding Sites on the X-Chromosome to Promote *Drosophila* Dosage Compensation. *PLoS genetics* **12**, e1006120 (2016).
